# Supplementary material for: N-Benzoylbenzamidinate complexes of aluminium: highly efficient initiators for the ring-opening polymerization of ε-caprolactone
Source: Royal Society of Chemistry journal article supplement (doi:10.1039/c4dt02026j), 2014-08-12
Supplement: c4dt02026j1.pdf [file c4dt02026j1.pdf]

Supplementary material

*N*-Benzoylbenzamidinate Complexes of Aluminium: Highly Efficient Initiators  
for the Ring-Opening Polymerization of  $\epsilon$ -Caprolactone

*K. Bakthavachalam, Ashwene Rajagopal and N. Dastagiri Reddy\**

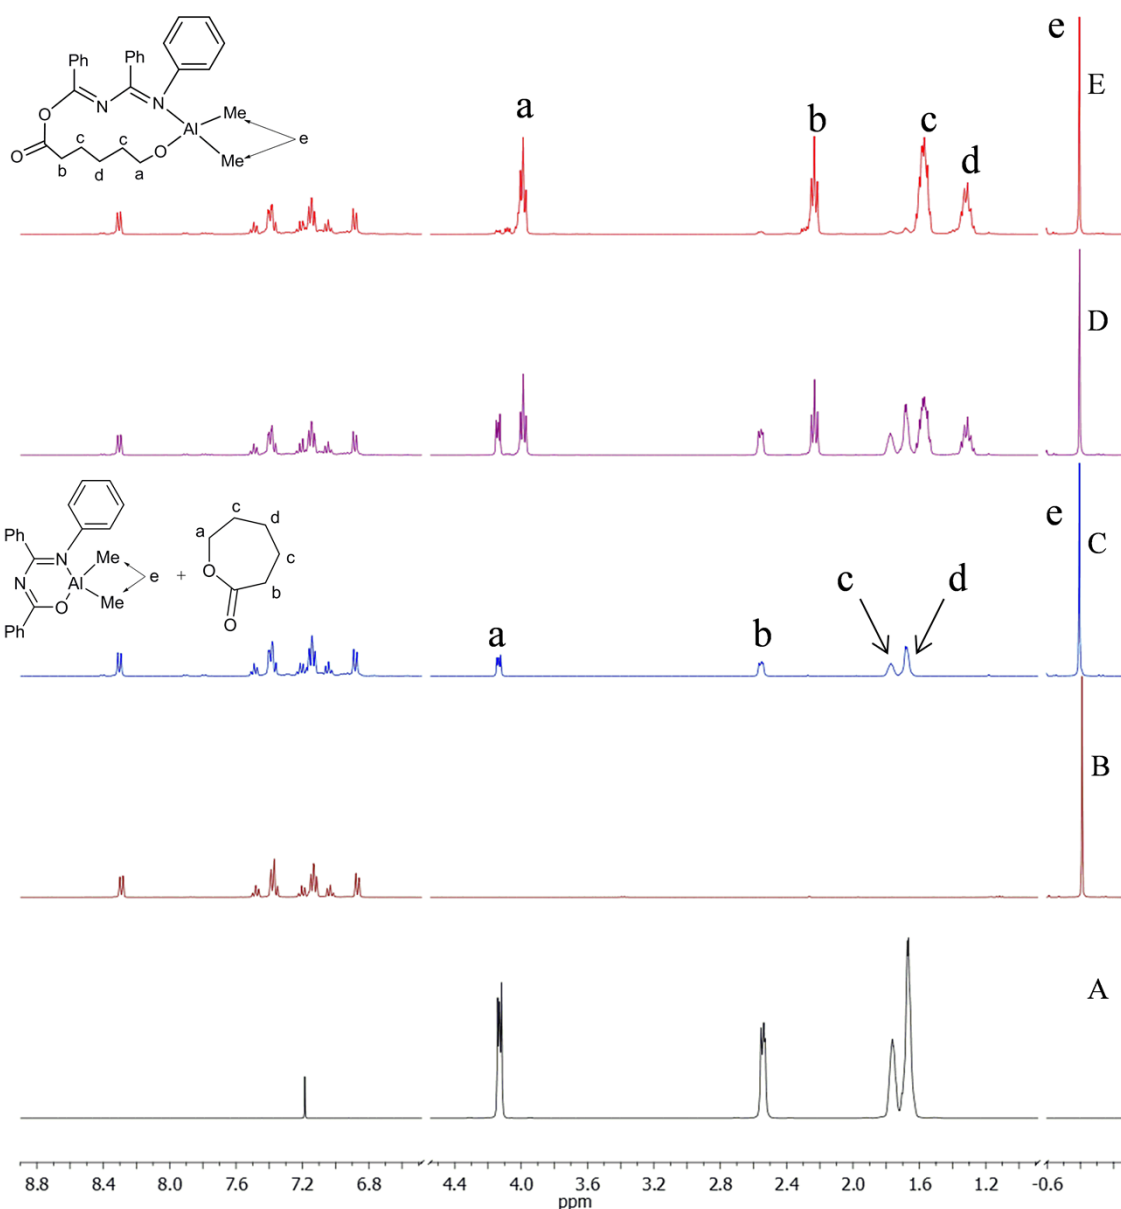

**Figure S1.**  $^1\text{H}$  NMR spectra of a reaction between **1** and  $\epsilon$ -CL in 1:1 ratio in  $\text{CDCl}_3$ : A:  $\epsilon$ -CL at room temperature. B: Complex **2** at room temperature. C:  $\epsilon$ -CL and **2** at room temperature. D and E:  $\epsilon$ -CL and **2** at 80 °C after 15 and 30 minutes respectively.

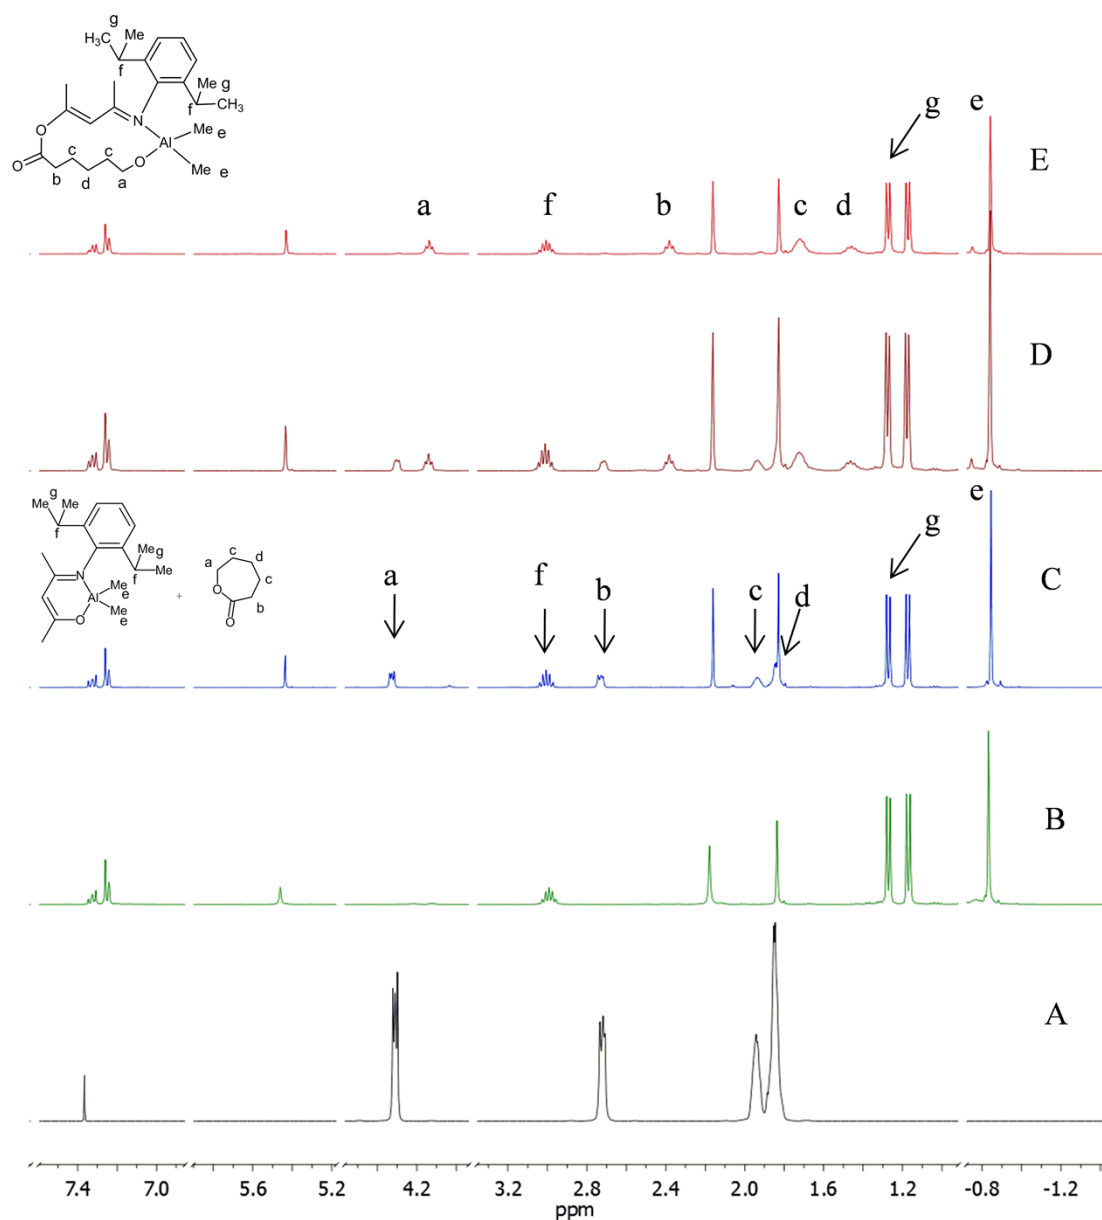

**Figure S2.**  $^1\text{H}$  NMR spectra of a reaction between ketiminate-Al complex and  $\epsilon$ -CL in 1:1 ratio in  $\text{CDCl}_3$ : A:  $\epsilon$ -CL at room temperature. B: Ketiminate-Al complex at room temperature. C:  $\epsilon$ -CL and ketiminate-Al complex at room temperature. D and E:  $\epsilon$ -CL and ketiminate-Al complex at 80 °C after 1 and 2 h respectively.

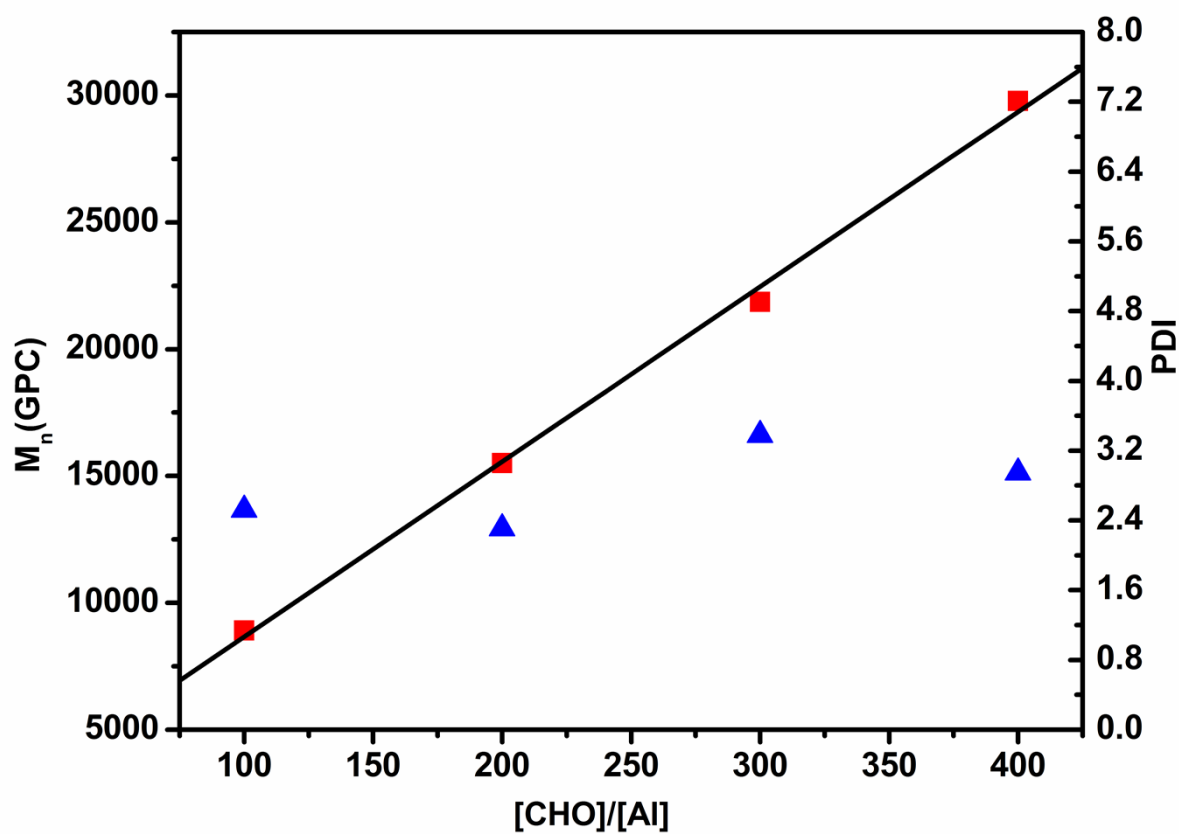

**Figure S3.** Plot of number-averaged molecular weight ( $M_n$ ) and polydispersity index, (PDI) vs  $[\text{CHO}]/[\text{Al}]$  for the polymerization of cyclohexene oxide using complex **1** at room temperature (entries 1 – 4, Table 2). Red squares (■) represent  $M_n$  (uncorrected) values and blue triangles (▲) represent PDI values.

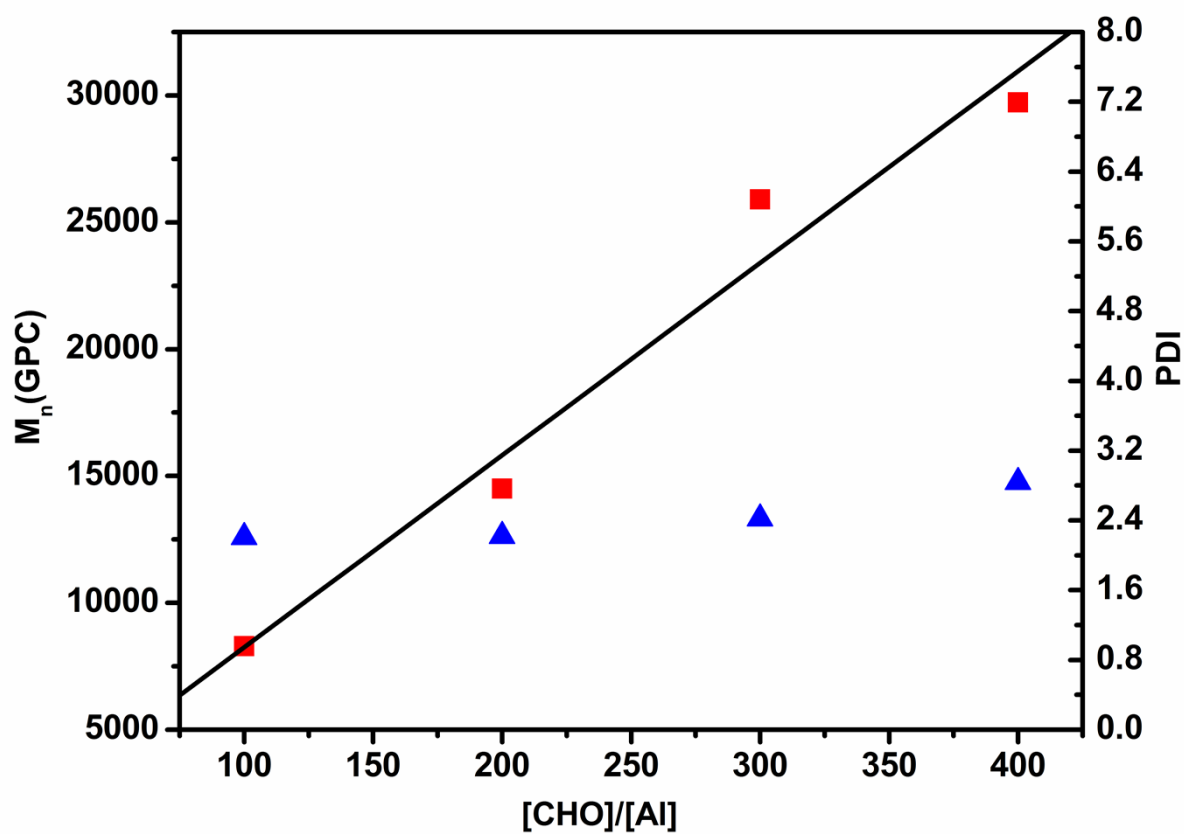

**Figure S4.** Plot of number-averaged molecular weight ( $M_n$ ) and polydispersity index, (PDI) vs  $[\text{CHO}]/[\text{Al}]$  for the polymerization of cyclohexene oxide using complex **2** at room temperature (entries 4 – 8, Table 2). Red squares (■) represent  $M_n$  (uncorrected) values and blue triangles (▲) represent PDI values.

**Table S1.** Crystal Data for Compounds **1**, **3** and **4**

|                                                                            | <b>1</b>                                           | <b>3</b>                                                         | <b>4</b>                                                        |
|----------------------------------------------------------------------------|----------------------------------------------------|------------------------------------------------------------------|-----------------------------------------------------------------|
| empirical formula                                                          | C <sub>28</sub> H <sub>33</sub> N <sub>2</sub> OAl | C <sub>53</sub> H <sub>57</sub> N <sub>4</sub> O <sub>2</sub> Al | C <sub>60</sub> H <sub>45</sub> AlN <sub>6</sub> O <sub>3</sub> |
| formula wt                                                                 | 440.54                                             | 809.01                                                           | 925.00                                                          |
| temp (K)                                                                   | 150(2)                                             | 150(2)                                                           | 150(2)                                                          |
| cryst syst                                                                 | monoclinic                                         | Orthorhombic                                                     | triclinic                                                       |
| space group                                                                | <i>I</i> 2/ <i>a</i>                               | <i>P</i> 2 <sub>1</sub> 2 <sub>1</sub> 2 <sub>1</sub>            | <i>P</i> $\bar{1}$                                              |
| <i>a</i> (Å)                                                               | 25.2618(13)                                        | 13.1875(5)                                                       | 11.3761(4)                                                      |
| <i>b</i> (Å)                                                               | 11.2363(7)                                         | 17.1684(9)                                                       | 12.4523(5)                                                      |
| <i>c</i> (Å)                                                               | 22.8425(16)                                        | 20.1357(10)                                                      | 19.8133(7)                                                      |
| $\alpha$ (deg)                                                             | 90.00                                              | 90.00                                                            | 99.277(3)                                                       |
| $\beta$ (deg)                                                              | 106.040(7)                                         | 90.00                                                            | 96.531(3)                                                       |
| $\gamma$ (deg)                                                             | 90.00                                              | 90.00                                                            | 109.381(3)                                                      |
| <i>V</i> (Å <sup>3</sup> )                                                 | 4998.0(6)                                          | 4558.9(4)                                                        | 2570.54(16)                                                     |
| <i>Z</i>                                                                   | 8                                                  | 4                                                                | 2                                                               |
| $\rho_{\text{calcd}}$ (Mg m <sup>-3</sup> )                                | 1.171                                              | 1.179                                                            | 1.195                                                           |
| $\mu$ (mm <sup>-1</sup> )                                                  | 0.103                                              | 0.089                                                            | 0.090                                                           |
| <i>F</i> (000)                                                             | 1888.0                                             | 1728.0                                                           | 968.0                                                           |
| cryst size (mm)                                                            | 0.3 × 0.3 × 0.1                                    | 0.42 × 0.21 × 0.2                                                | 0.35 × 0.31 × 0.3                                               |
| $\theta$ range (deg)                                                       | 2.73–29.22                                         | 2.55–25                                                          | 2.96–25                                                         |
| no. of collected/unique rflns                                              | 17036 /5948<br>( <i>R</i> (int) = 0.0477)          | 14429 /7812<br>( <i>R</i> (int) = 0.0610)                        | 23555/9060<br>[ <i>R</i> (int) = 0.0584]                        |
| no. of data/restraints/params                                              | 5948/0/295                                         | 7812/0/550                                                       | 9060/0/631                                                      |
| <i>R</i> 1, <i>wR</i> 2 ( <i>I</i> > 2 $\sigma$ ( <i>I</i> )) <sup>a</sup> | 0.0532, 0.1386                                     | 0.0632, 0.0784                                                   | 0.0525, 0.11136                                                 |
| <i>R</i> 1, <i>wR</i> 2 (all data) <sup>a</sup>                            | 0.0702, 0.1537                                     | 0.1186, 0.0952                                                   | 0.0937, 0.1339                                                  |
| GOF                                                                        | 1.040                                              | 0.991                                                            | 0.905                                                           |
| $\Delta\rho_{\text{max}}/\Delta\rho_{\text{min}}$ (e Å <sup>-3</sup> )     | 0.53/–0.47                                         | 0.24/–0.31                                                       | 0.22/–0.32                                                      |

<sup>a</sup>*R*1 =  $\Sigma||F_o| - |F_c||/\Sigma|F_o|$ ; *wR*2 =  $[\Sigma w(F_o^2 - F_c^2)^2/\Sigma w(F_o^2)^2]^{0.5}$ .
